# Supplementary material
Source: PubMed Central journal article supplement (PMC2846760)

Stratified UK+Aus, lambda=1.14

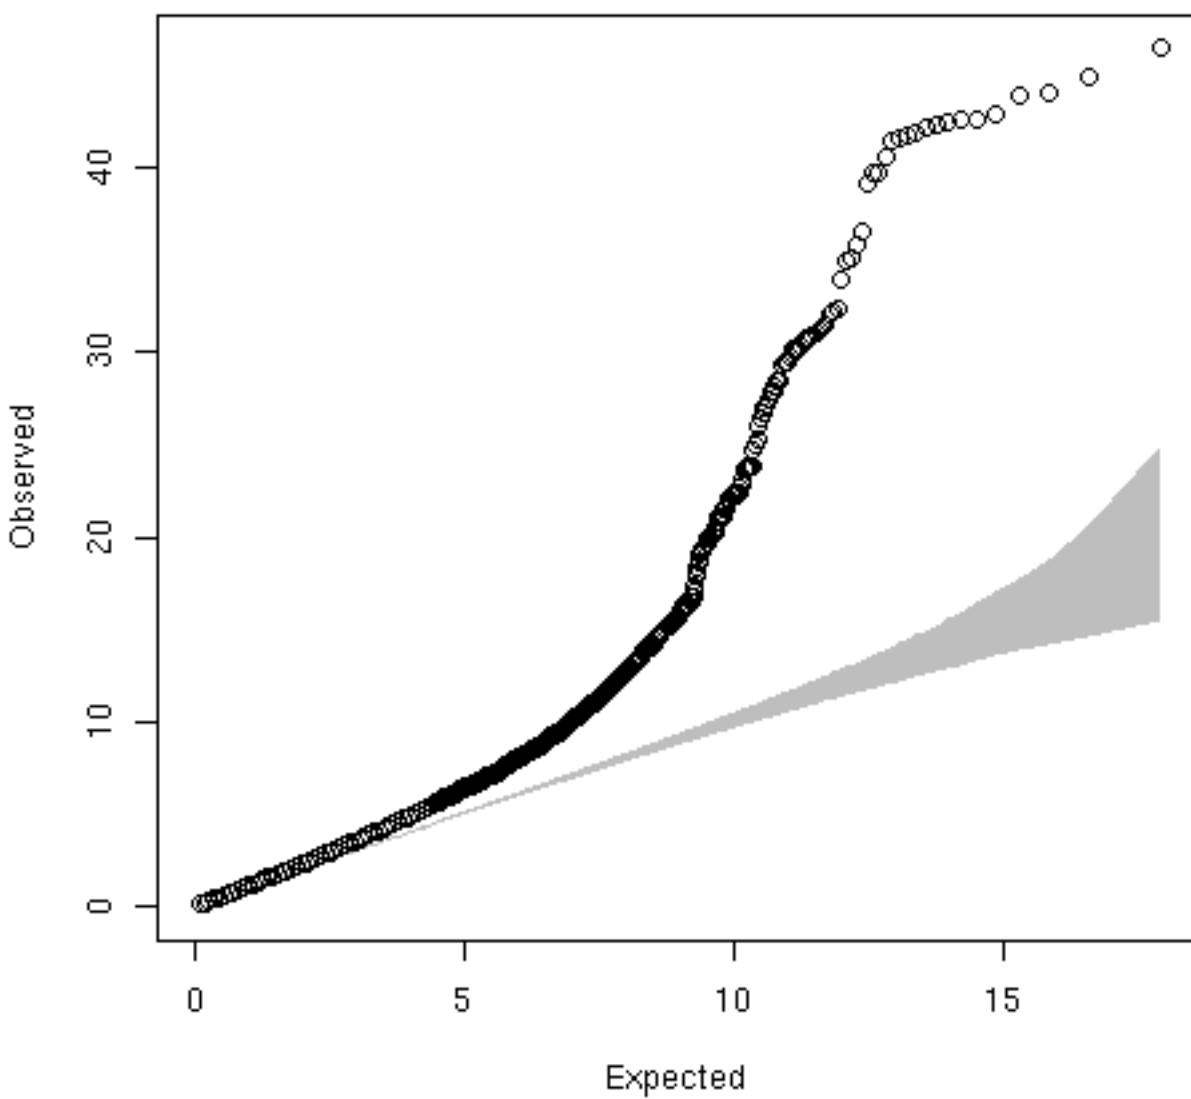

Supplement: NIHMS180501-supplement-Supp_Fig_1a.pdf [file NIHMS180501-supplement-Supp_Fig_1a.pdf]

Aus, lambda=1.23

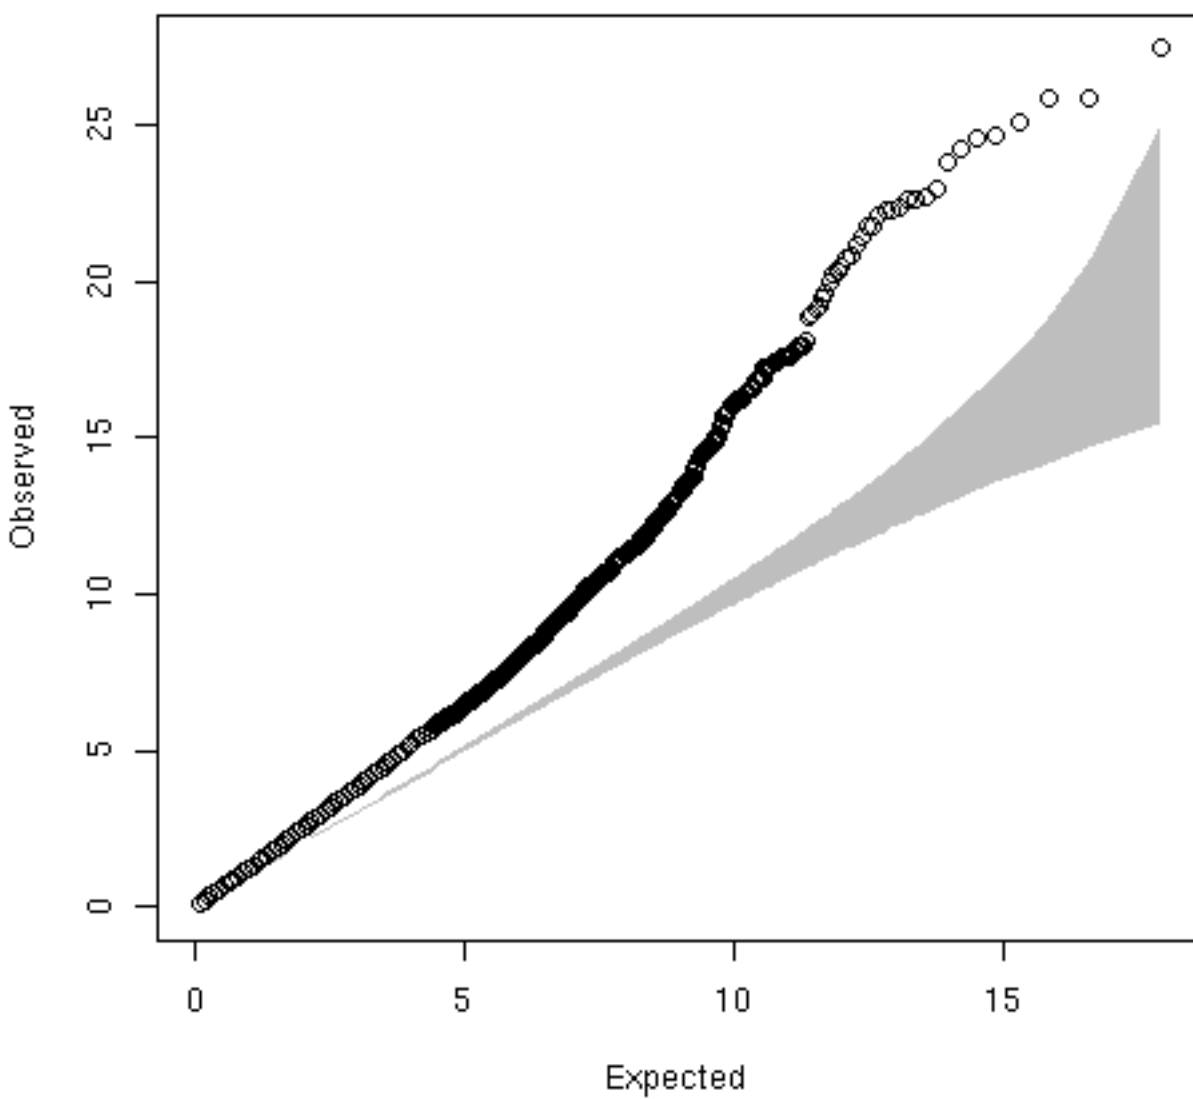

Supplement: NIHMS180501-supplement-Supp_Fig_1b.pdf [file NIHMS180501-supplement-Supp_Fig_1b.pdf]

Stratified Aus, lambda=1.08

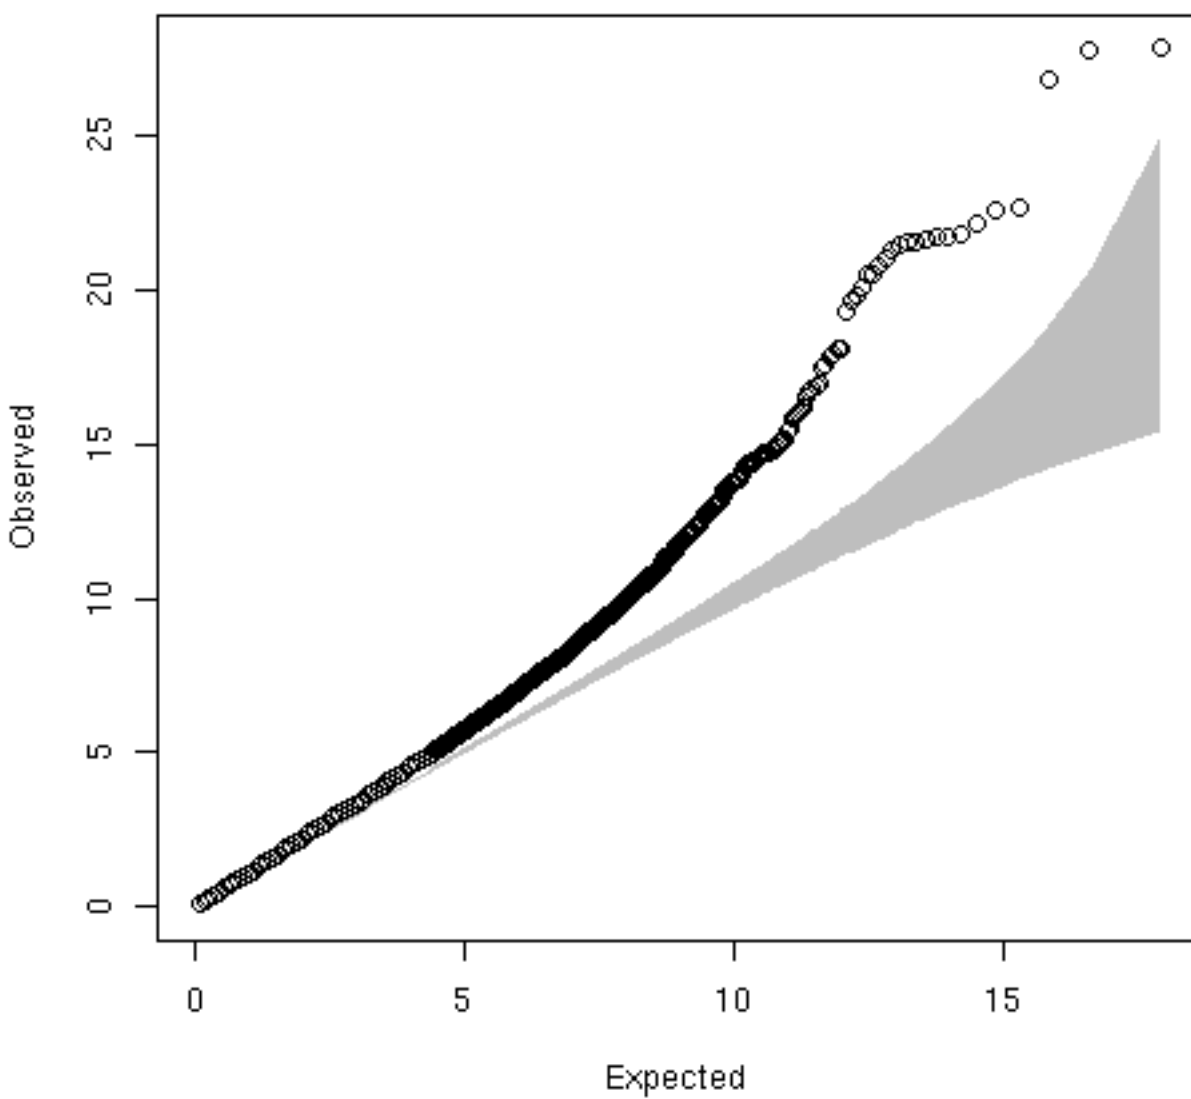

Supplement: NIHMS180501-supplement-Supp_Fig_1c.pdf [file NIHMS180501-supplement-Supp_Fig_1c.pdf]

Stratified UK+Aus, lambda=1.14



Supplement: NIHMS180501-supplement-Supp_Fig_1d.pdf [file NIHMS180501-supplement-Supp_Fig_1d.pdf]

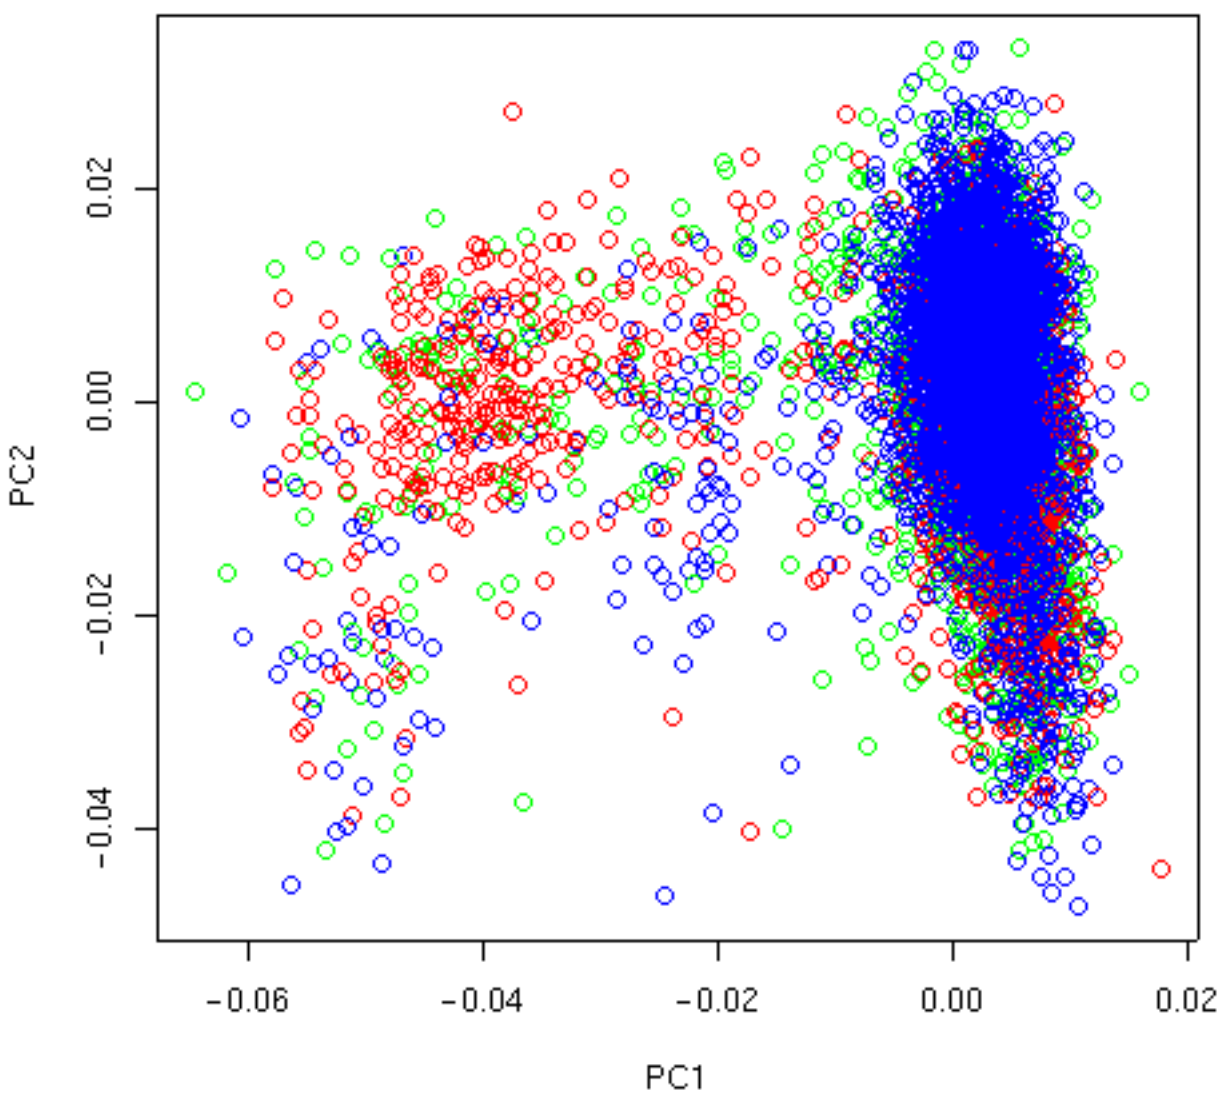

Supplement: NIHMS180501-supplement-Supp_Fig_2.pdf [file NIHMS180501-supplement-Supp_Fig_2.pdf]
